# Supplementary material for: Mouse Adapted SARS-CoV-2 protects animals from lethal SARS-CoV challenge
Source: PubMed Central journal article supplement — bioRxiv. 2021 May 4:2021.05.03.442357. Preprint. [Version 1] doi: 10.1101/2021.05.03.442357 (PMC8109199; doi:10.1101/2021.05.03.442357), 2021-05-04
Supplement: NIHPP2021.05.03.442357-supplement-1.pdf [file NIHPP2021.05.03.442357-supplement-1.pdf]

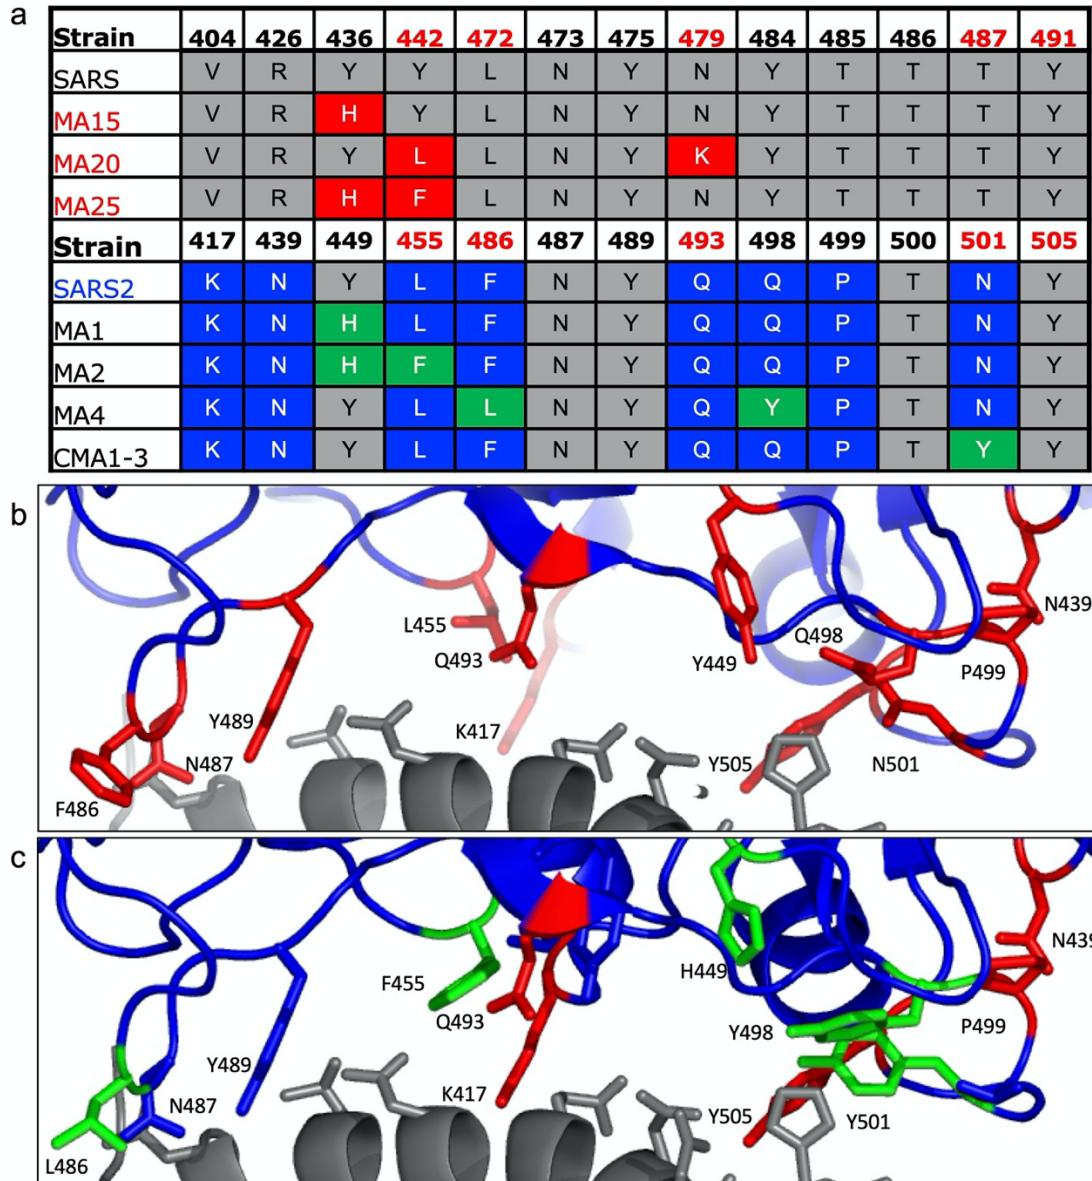

394  
 395 **S. Figure 1. Modeling changes to mouse-adapt SARS-CoV-2.** a) Key amino acid residues found in the  
 396 receptor binding domain (RBD) of mouse adapted strains of SARS-CoV were aligned to SARS-CoV-2  
 397 and used to design mouse-adapted mutations 13. Key interaction sites between SARS-CoV spike and  
 398 ACE2 molecules highlight in red 30. b-c) Modeling of key RBD residue interactions with mouse ACE2  
 399 (PDB:2AJF) comparing b) WT SARS-Cov-2 residues versus c) mutations (green) predicted to improve  
 400 binding.

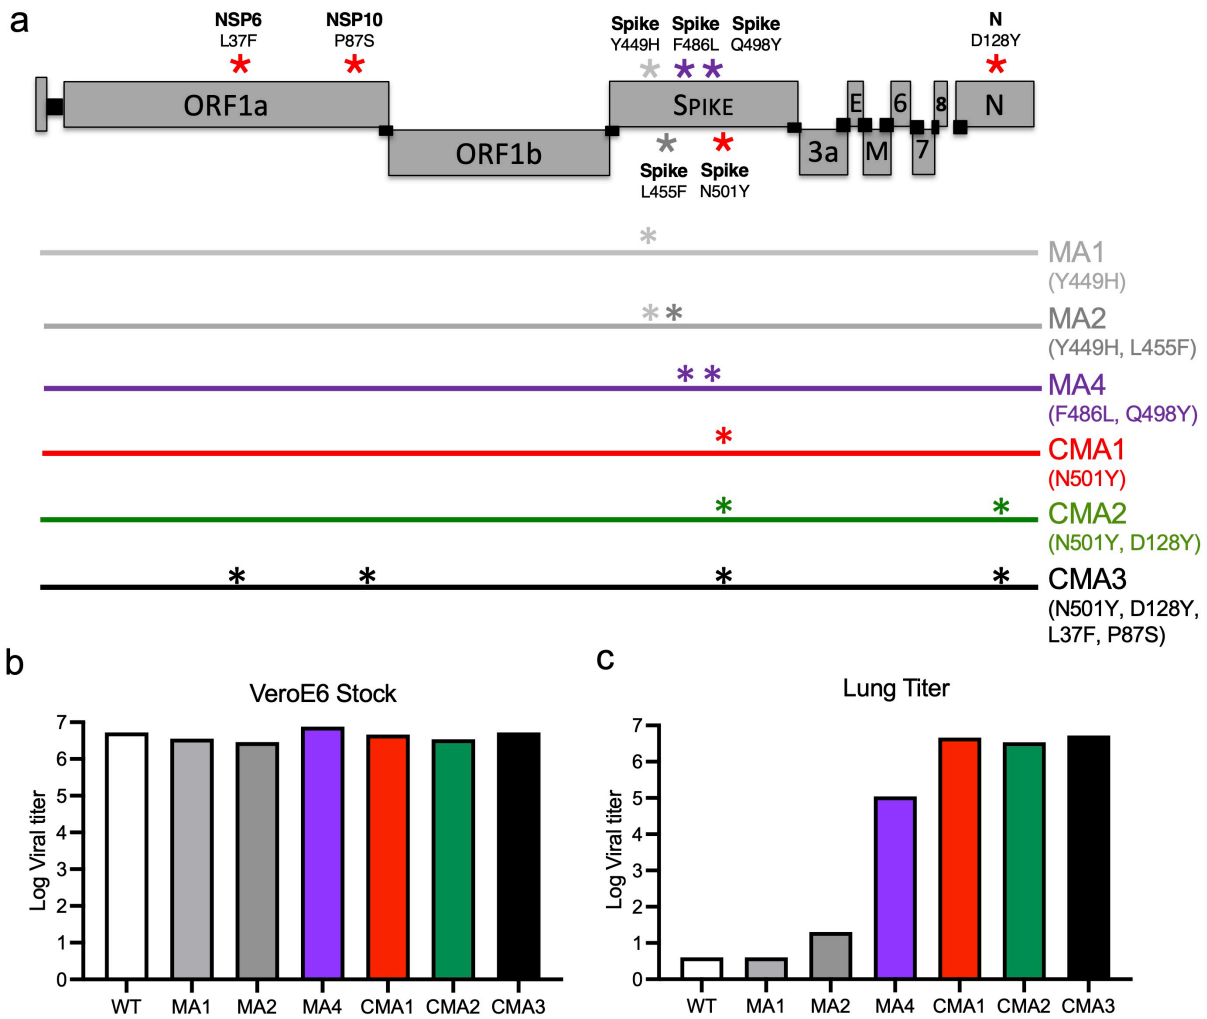

401  
 402 **S. Figure 2. Construction of mouse-adapted SARS-CoV-2 Mutants.** a) SARS-CoV-2 genome  
 403 schematic indicating location of amino acid mutations for MA1, MA2, MA4, CMA1, CMA2, and  
 404 CMA3. b) Viral replication of stock viruses of MA1, MA2, MA4, and CMA1-3 grown on VeroE6  
 405 cells. c) Viral replication of MA1, MA2, MA4, and CMA1-3 from lung homogenates isolated from  
 406 infected mice 2 days post infection.  
 407

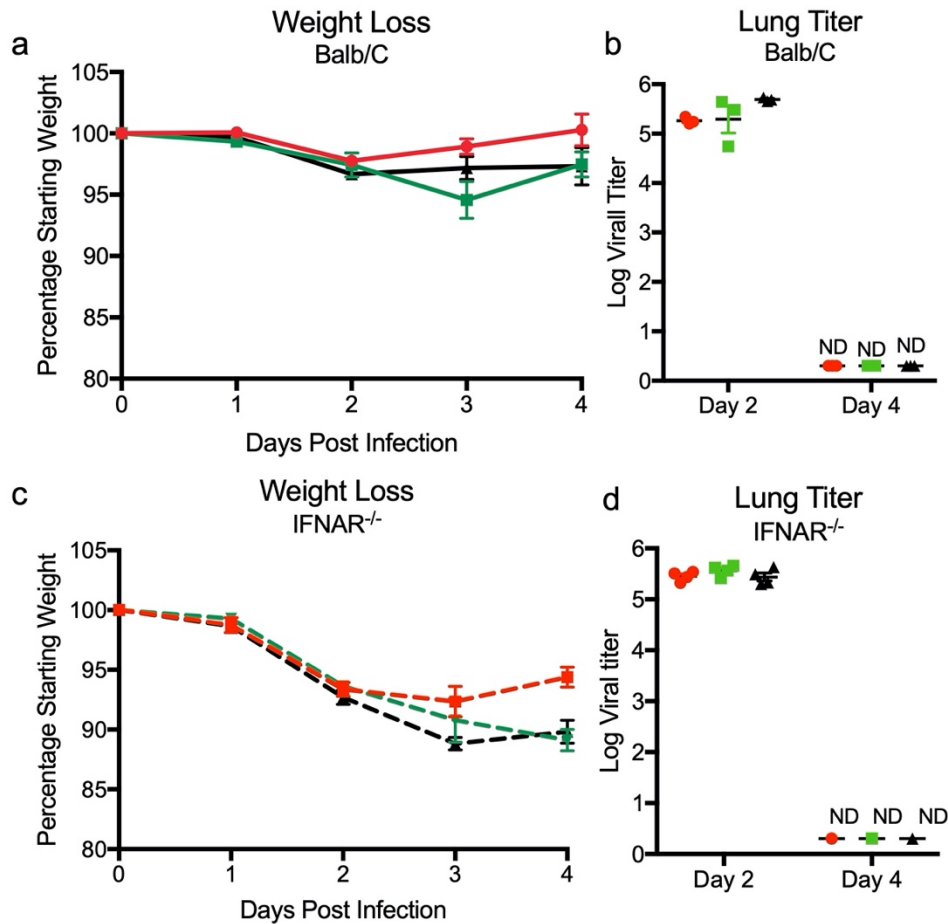

408  
409  
410  
411  
412  
413  
414  
415

**S. Figure 3. SARS-CoV-2 mutants CMA1, CMA2, and CMA3 replicate in laboratory mice.** a- b) Ten-week-old female Balb/c mice infected with 105 PFU of CMA1 (red), CMA2 (green), or CMA3 (black) were examined for a) weight loss and b) viral lung titer following infection at days 2 and 4. c-d) Ten- to twelve-week-old female IFNAR<sup>-/-</sup> SVJ129 mice infected 105 PFU of CMA1 (red), CMA2 (green), or CMA3 (black) were examined for c) weight loss and d) viral lung titer following infection at days 2 and 4. ND- non-detected.

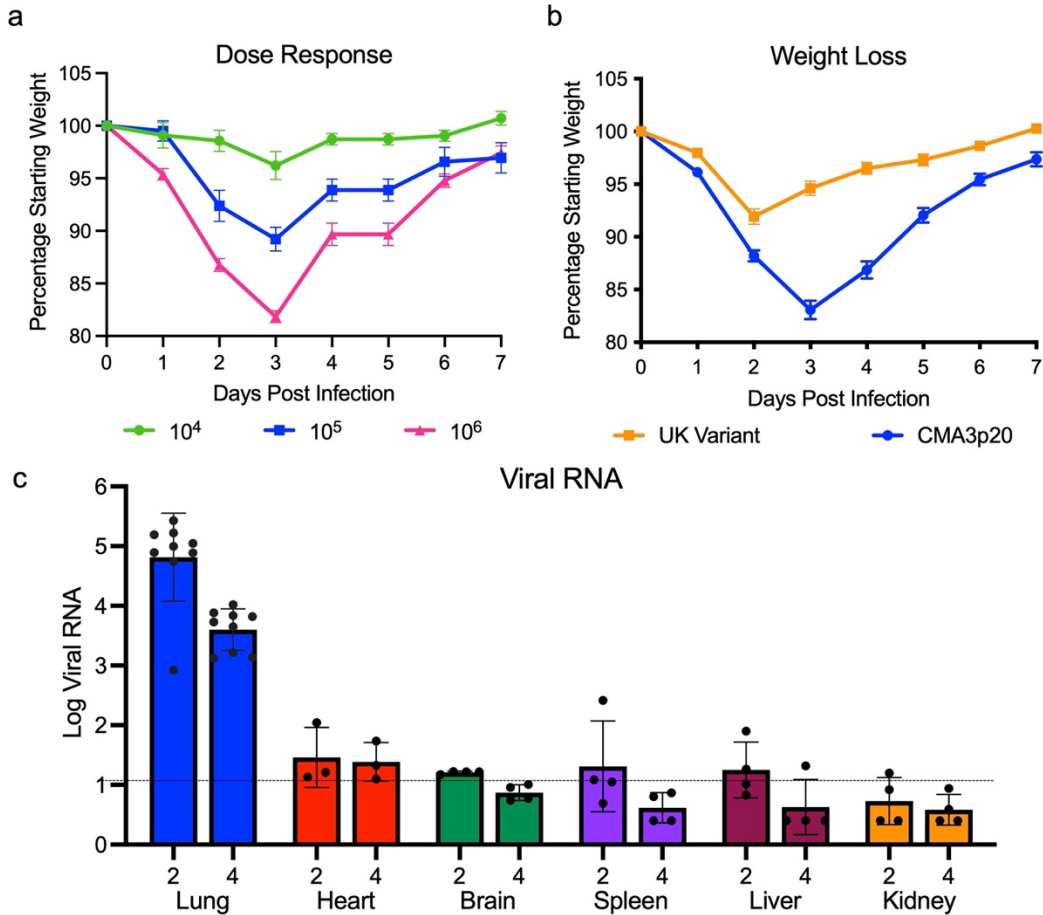

416  
417  
418  
419  
420  
421  
422

**S. Figure 4. In vivo characterization of SARS-CoV-2 CMA3p20.** a) Examination of ten-week-old female Balb/c mice infected with SARS-CoV-2 CMA3p20 at 10<sup>4</sup>, 10<sup>5</sup>, and 10<sup>6</sup> PFU (n=5). b) Comparison of weight loss in ten-week old female Balb/c mice infected with 10<sup>6</sup> PFU of SARS-CoV-2 CMA3p20 (blue) or SARS-CoV-2 variant B.1.1.7 (orange). c) RT-PCR of viral RNA load found in lung, heart, brain, spleen, liver, and kidney following 10<sup>5</sup> PFU infection of SARS-CoV-2 CMA3p20 2- and 4-days post infection. Dotted line signifies viral RNA value derived from mock infected samples.

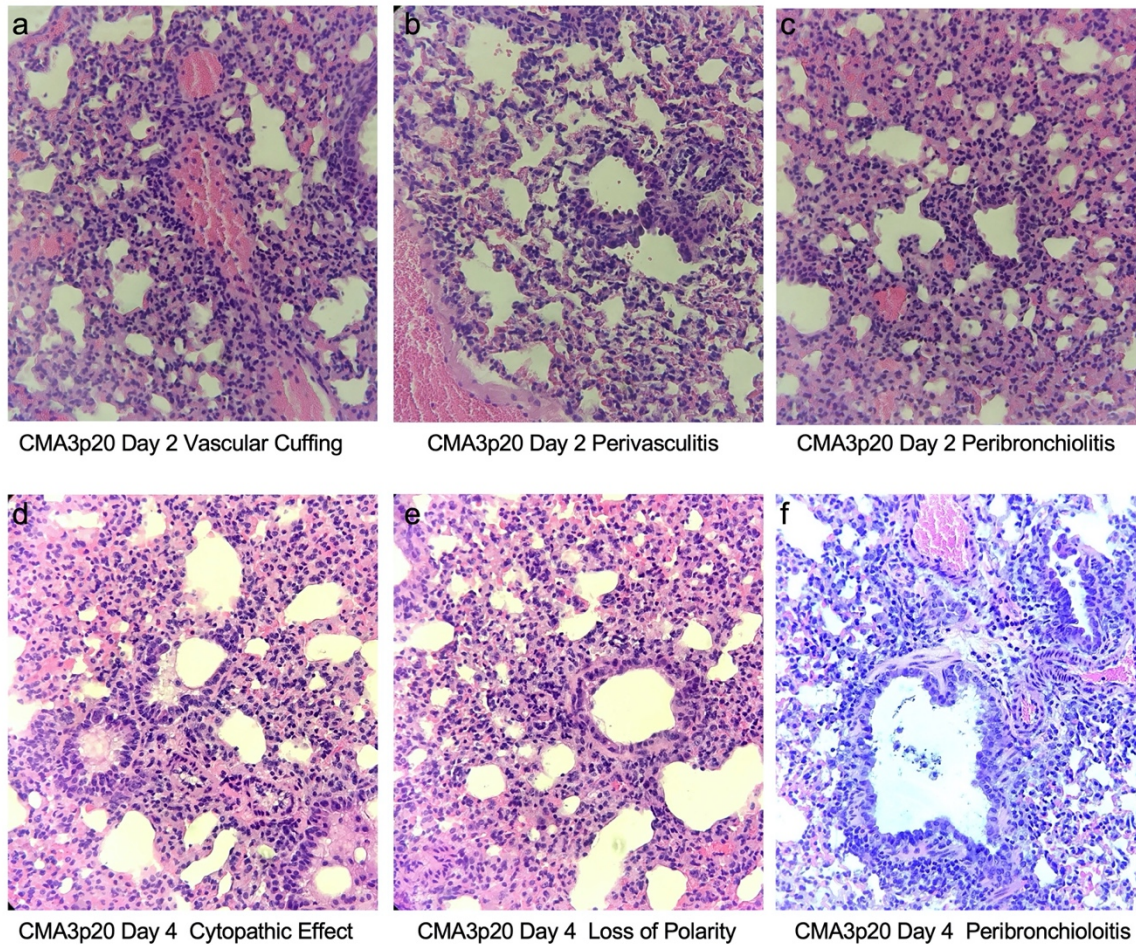

423  
424  
425  
426  
427  
428

**S. Figure 5. SARS-CoV-2 CMA3p20 induces significant lung damage following infection.**

a-c) CMA3p20 infected animals 2 days post infection showing a) perivascular cuffing, b) perivasculitis and c) peribronchiolitis. d-f) CMA3p20 induced lung inflammation and damage 4 days post infection including d) cytopathic effect of the virus, e) loss of cellular polarity, and f) inflammatory cells in the lumen. Magnification at 10x for a-f.
